# Supplementary material for: Analysis of a risk prevention document using dependability techniques: a first step towards an effectiveness model
Source: Copernicus journal article supplement (doi:10.5194/nhess-18-1201-2018), 2018-04-20
Supplement: Supplementary file 1 [file nhess-18-1201-2018-supplement.zip]

Archive with 2 entries (2 files):
- DICRIM URL Table_LF.docx
- nhess-18-1201-2018-supplement-title-page.pdf
