# Supplementary material for: Analysis of a risk prevention document using dependability techniques: a first step towards an effectiveness model
Source: Copernicus journal article supplement (doi:10.5194/nhess-18-1201-2018), 2018-04-20
Supplement: Supplementary file 1 [file nhess-18-1201-2018-supplement.zip › DICRIM URL Table_LF.docx]

| ***Aix en Provence*** | http://observatoire-regional-risques-paca.fr/sites/default/files/information/DICRIM_13001_MP_AIX_EN_PROVENCE_2007.pdf |
| --- | --- |
| ***Arles*** | http://observatoire-regional-risques-paca.fr/sites/default/files/information/DICRIM_13004_MP_ARLES_2010.pdf |
| ***Aubagne*** | http://observatoire-regional-risques-paca.fr/sites/default/files/information/DICRIM_13005_MP_AUBAGNE_2017.pdf |
| ***Avignon*** | http://observatoire-regional-risques-paca.fr/sites/default/files/information/DICRIM_84007_MP_AVIGNON_2003.pdf |
| ***Barcelonette*** | http://observatoire-regional-risques-paca.fr/sites/default/files/information/DICRIM_04019_MP_BARCELONNETTE_2013.pdf |
| ***Barrème*** | http://observatoire-regional-risques-paca.fr/sites/default/files/information/DICRIM_04022_MP_BARREME_2010.pdf |
| ***Bignoles*** | http://observatoire-regional-risques-paca.fr/sites/default/files/information/DICRIM_83023_MP_BRIGNOLES_2015.pdf |
| ***Bollène*** | http://observatoire-regional-risques-paca.fr/sites/default/files/information/DICRIM_84019_MP_BOLLENE_2017.pdf |
| ***Briançon*** | http://observatoire-regional-risques-paca.fr/sites/default/files/information/DICRIM_05023_MP_BRIANCON_2012.pdf |
| ***Cassis*** | http://observatoire-regional-risques-paca.fr/sites/default/files/information/DICRIM_13022_MP_CASSIS_2012.pdf |
| ***Chorges*** | http://observatoire-regional-risques-paca.fr/sites/default/files/information/DICRIM_05040_MP_CHORGES_2013.pdf |
| ***Draguignan*** | http://observatoire-regional-risques-paca.fr/sites/default/files/information/DICRIM_83050_MP_DRAGUIGNAN_2017.pdf |
| ***Fos-sur-mer*** | http://observatoire-regional-risques-paca.fr/sites/default/files/information/DICRIM_13039_MP_FOS_SUR_MER_2009.pdf |
| ***Fréjus*** | http://observatoire-regional-risques-paca.fr/sites/default/files/information/DICRIM_83061_MP_FREJUS_2016.pdf |
| ***Gap*** | http://observatoire-regional-risques-paca.fr/sites/default/files/information/DICRIM_05061_MP_GAP_2010.pdf |
| ***La Ciotat*** | http://observatoire-regional-risques-paca.fr/sites/default/files/information/DICRIM_13028_MP_LA_CIOTAT_2007.pdf |
| ***Mandelieu*** | http://observatoire-regional-risques-paca.fr/sites/default/files/information/DICRIM_06079_MP_MANDELIEU_LA_NAPOULE_2009.pdf |
| ***Marseille*** | http://observatoire-regional-risques-paca.fr/sites/default/files/information/DICRIM_13055_MP_MARSEILLE_2010.pdf |
| ***Martigues*** | http://observatoire-regional-risques-paca.fr/sites/default/files/information/DICRIM_13056_MP_MARTIGUES_2013.pdf |
| ***Miramas*** | http://observatoire-regional-risques-paca.fr/sites/default/files/information/DICRIM_13063_MP_MIRAMAS_2013.pdf |
| ***Névache*** | http://observatoire-regional-risques-paca.fr/sites/default/files/information/DICRIM_05093_MP_NEVACHE_2013.pdf |
| ***Nice*** | http://observatoire-regional-risques-paca.fr/sites/default/files/information/DICRIM_06088_MP_NICE_2014.pdf |
| ***Ribiers*** | http://observatoire-regional-risques-paca.fr/sites/default/files/information/DICRIM_05118_MP_RIBIERS_2011.pdf |
| ***Saint-Tropez*** | http://observatoire-regional-risques-paca.fr/sites/default/files/information/DICRIM_83119_MP_SAINT-TROPEZ_2012.pdf |
| ***Saint-victoret*** | http://observatoire-regional-risques-paca.fr/sites/default/files/information/DICRIM_13102_MP_SAINT_VICTORET_2012.pdf |
| ***Salon-de-Provence*** | http://observatoire-regional-risques-paca.fr/sites/default/files/information/DICRIM_13103_MP_SALON-DE-PROVENCE_2017.pdf |
| ***Toulon*** | http://observatoire-regional-risques-paca.fr/sites/default/files/information/DICRIM_83137_MP_TOULON_2010.pdf |
| ***Vaison-la-romaine*** | http://observatoire-regional-risques-paca.fr/sites/default/files/information/DICRIM_84137_MP_VAISON_LA_ROMAINE_2010.pdf |
| ***Vars*** | http://observatoire-regional-risques-paca.fr/sites/default/files/information/DICRIM_05177_MP_VARS_2011.pdf |
| ***Veynes*** | http://observatoire-regional-risques-paca.fr/sites/default/files/information/DICRIM_05179_MP_VEYNES_2013.pdf |

Short text: In this article, detection elements were identified to control the conformity of the DICRIM regarding the law. The use of those detection elements was applied to some existing DICRIM from PACA region. The URL of all DICRIM used for this apply can be found in this table above.
