# Supplementary material for: Analysis of a risk prevention document using dependability techniques: a first step towards an effectiveness model
Source: Copernicus journal article supplement (doi:10.5194/nhess-18-1201-2018), 2018-04-20
Supplement: Supplementary file 1 [file nhess-18-1201-2018-supplement.zip › nhess-18-1201-2018-supplement-title-page.pdf]

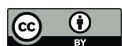

## *Supplement of*

# **Analysis of a risk prevention document using dependability techniques: a first step towards an effectiveness model**

**Laetitia Ferrer et al.**

*Correspondence to:* Laetitia Ferrer ([laetitia.ferrer@irstea.fr](mailto:laetitia.ferrer@irstea.fr))

- [nhess-18-1201-2018-supplement-title-page.pdf](#)
- [DICRIM URL Table\\_LF.docx](#)

The copyright of individual parts of the supplement might differ from the CC BY 4.0 License.
